## Population study of post-stroke dysphagia

1  
2  
3  
4  
5  
6  
7  
8  
9  
10  
11  
12  
13  
14  
15  
16  
17  
18  
19  
20  
21  
22  
23  
24  
25  
26  
27  
28  
29  
30  
31  
32

Health factors associated with development and severity of post-stroke dysphagia: an  
epidemiological investigation.

Brittany N Krekeler<sup>1,2</sup>, Heidi J P Schieve<sup>3</sup>, Jane Khoury<sup>4</sup>, Lili Ding,<sup>4</sup> Mary Haverbusch<sup>2</sup>, Kathleen  
Alwell<sup>2</sup>, Opeolu Adeoye<sup>5</sup>, Simona Feriolo<sup>2</sup>, Jason Mackey<sup>6</sup>, Daniel Woo<sup>2</sup>, Matthew Flaherty<sup>2</sup>,  
Felipe De Los Rios La Rosa<sup>2,7</sup>, Stacie Demel<sup>2</sup>, Michael Star<sup>8</sup>, Elisheva Coleman<sup>9</sup>, Kyle Walsh<sup>2</sup>,  
Sabreena Slavin<sup>10</sup>, Adam Jasne<sup>11</sup>, Eva Mistry<sup>2</sup>, Dawn Kleindorfer<sup>2,12</sup> Brett Kissela<sup>2</sup>

<sup>1</sup>University of Cincinnati College of Medicine, Department of Otolaryngology-Head and Neck Surgery  
<sup>2</sup>University of Cincinnati College of Medicine, Department of Neurology and Rehabilitation Medicine  
<sup>3</sup>Wake Forest School of Medicine  
<sup>4</sup>Division of Biostatistics and Epidemiology, Cincinnati Children's Hospital Medical Center, Department of  
Pediatrics, University of Cincinnati College of Medicine  
<sup>5</sup>Washington University School of Medicine, Department of Emergency Medicine  
<sup>6</sup>Indiana University School of Medicine, Department of Neurology  
<sup>7</sup>Baptist Health South Florida, Miami Neuroscience Institute  
<sup>8</sup>Sorkoa Medical Center, Israel  
<sup>9</sup>University of Chicago Medicine, Department of Neurology  
<sup>10</sup>University of Kansas Medical Center, Department of Neurology  
<sup>11</sup>Yale School of Medicine, Department of Neurology  
<sup>12</sup>University of Michigan, Department of Neurology

Corresponding Author:  
Brittany Krekeler, PhD, CCC-SLP  
231 Albert Sabin Way, ML 0528  
Room 6307C  
Cincinnati, OH 45267

## Population study of post-stroke dysphagia

33

### 34 **Abstract**

35 **Background and Purpose:** Dysphagia is a common post-stroke occurrence and has been  
36 shown to impact patients' morbidity and mortality. The purpose of this study was to use a large  
37 population-based dataset to determine specific epidemiological and patient health risk factors  
38 that impact development and severity of dysphagia after acute stroke.

39 **Methods:** Using data from the Greater Cincinnati Northern Kentucky Stroke Study, GCNKSS,  
40 involving a representative sample of approximately 1.3 million people from Southwest Ohio and  
41 Northern Kentucky of adults (age  $\geq 18$ ), ischemic and hemorrhagic stroke cases from 2010 and  
42 2015 were identified via chart review. Dysphagia status was determined based on bedside and  
43 clinical assessments, and severity by necessity for alternative access to nutrition via nasogastric  
44 (NG) or percutaneous endoscopic gastrostomy (PEG) tube placement. Comparisons between  
45 patients with and without dysphagia were made to determine differences in baseline  
46 characteristics and pre-morbid conditions. Multivariable logistic regression was used to  
47 determine factors associated with increased risk of developing dysphagia.

48 **Results:** Dysphagia status was ascertained from 4139 cases (1709 with dysphagia). Logistic  
49 regression showed: increased age, Black race, higher NIHSS score at admission, having a  
50 hemorrhagic stroke (vs infarct), and right hemispheric stroke increased risk of developing  
51 dysphagia after stroke. Factors associated with reduced risk included history of high cholesterol,  
52 lower pre-stroke mRS score, and white matter disease.

53 **Conclusions:** This study replicated many previous findings of variables associated with  
54 dysphagia (older age, worse stroke, right sided hemorrhagic lesions), while other variables  
55 identified were without clear biological rationale (e.g. Black race, history of high cholesterol and  
56 presence of white matter disease). These factors should be investigated in future, prospective  
57 studies to determine biological relevance and potential influence in stroke recovery.

58

## Population study of post-stroke dysphagia

### 59 **Introduction**

60           The development of swallowing impairments (dysphagia) has been shown to have an  
61 impact on hospitalization timeline and comorbidities associated with acute stroke recovery.<sup>1</sup>  
62 Specifically, patients with dysphagia have poor nutrition and hydration,<sup>1</sup> both of which are  
63 critical for neural recovery after stroke.<sup>1,2</sup> Dysphagia is also associated with higher risk of  
64 pneumonia, a serious and deadly complication of swallowing impairment.<sup>3-10</sup>

65           Prior investigations of dysphagia after ischemic or hemorrhagic stroke have focused  
66 primarily on characterizing specific impairments in swallow physiology based on lesion location  
67 and size,<sup>11-13</sup> or reporting on specific outcomes of these impairments in this population.<sup>3,14</sup>  
68 These investigations are highly relevant for assessing and treating the disorder and  
69 understanding disposition of these patients. However, patient-specific factors related to  
70 increased risk of developing dysphagia after stroke, and patient characteristics linked to severity  
71 of dysphagia, are not well understood. These patient-specific factors include both pre-morbid  
72 health conditions (e.g. heart disease) and patient demographics (e.g. sex, age, race), which in-  
73 part derive social determinants of health (e.g. economic stability and health literacy/education)<sup>15</sup>  
74 and are known to impact health outcomes at multiple levels.<sup>16</sup> Gaining an understanding of  
75 underlying conditions, biological, and socioeconomic risk factors that may predispose patients to  
76 developing swallowing disorders after stroke would provide opportunities for preventative care.  
77 To date, there have been no study populations large enough to address these gaps.

78           The goal of this work is to investigate incidence of dysphagia after stroke in a large  
79 retrospective, population-based dataset to determine what patient-specific factors may influence  
80 dysphagia status, or severity of impairment. These data will guide future investigations to better  
81 understand how and why certain individuals develop swallowing impairments after stroke and  
82 what can be done in acute clinical management of stroke to help prevent development of  
83 swallowing disorders.

### 84 **Methods**

## Population study of post-stroke dysphagia

85 The Greater Cincinnati Northern Kentucky Stroke Study (GCNKSS) has been previously  
86 described in detail; <sup>17-21</sup> in brief, this is a population-based study using retrospective  
87 ascertainment of physician adjudicated stroke cases in a sample of approximately 1.3 million  
88 people across five counties in Southwestern Ohio and Northern Kentucky. All hospitalized adult  
89 (age  $\geq 18$ ) ischemic and hemorrhagic stroke cases from 2010 and 2015 were identified using  
90 International Classification of Diseases (ICD) stroke codes (ICD-9 430-436; ICD-10 I60-I69) at  
91 15 area hospitals.

### 92 *Case Definition – Dysphagia vs No Dysphagia*

93 Dysphagia status was identified through Electronic Medical Record (EMR) review by  
94 study team Registered Nurses. Individuals with documentation in the EMR of swallowing  
95 impairment were included in the “Dysphagia” group. Given the known variability in swallowing  
96 assessment practices both within and across institutions (e.g. timing of initial screening, formal  
97 evaluation by a speech-language pathologist vs bedside screen by nursing staff, etc), <sup>22,23</sup>  
98 documentation of dysphagia varied depending on the case, the treating institution, and clinical  
99 practices at time of stroke. Assessment of dysphagia status was also documented in the EMR.  
100 This could include a formal swallow assessment (bedside and/or instrumental by a speech-  
101 language pathologist) or a nursing bedside screen. Only individuals who were determined not to  
102 have dysphagia after one or more of these assessments were included in the “No Dysphagia”  
103 group. Within the identified “Dysphagia” group, individuals were compared based on their need  
104 for access to alternative nutrition during acute hospital stay. Individuals were categorized as one  
105 of the following (Dysphagia PO Subgroups): 1) Dysphagia not requiring PEG/NG (i.e. dysphagia  
106 management only required a modified texture and/or liquid diet), 2) Dysphagia requiring NG, 3)  
107 Dysphagia requiring PEG. PO status was determined and confirmed through same chart review  
108 procedures previously described. For cases where dysphagia status changed (i.e. progressed)  
109 throughout inpatient stay, the most invasive intervention required was documented (i.e. PEG  
110 was placed after NG).

## Population study of post-stroke dysphagia

### 111 *Patient Characteristics - Demographics, Clinical Presentation, Pre-Morbid Conditions*

112 Patients included in the analyses were further characterized and compared (Dysphagia  
113 vs No Dysphagia, and Dysphagia PO Subgroups). The following patient characteristics were  
114 available for analysis, abstracted during the RN chart review process: 1) Patient demographic  
115 and social determinants of health data: age, sex, race, ethnicity, and estimation of a  
116 neighborhood Deprivation Index score;<sup>24</sup> 2) Clinical presentation at time of acute injury: National  
117 Institutes of Health Stroke Scale [NIHSS], pre-stroke Modified Rankin Scale [mRS], Glasgow  
118 Coma Score; 3) Stroke/lesion characteristics: type of case [ischemic/hemorrhagic], lesion  
119 location [hemisphere], ischemic stroke subtype [small vessel, cardioembolic, large vessel]; 4)  
120 Comorbidities (pre-morbid conditions): history of hypertension, diabetes, elevated cholesterol,  
121 coronary artery disease, myocardial infarction [MI], congestive heart failure [CHF], prior stroke,  
122 prior transient ischemic attack [TIA], dementia, brain injury or tumor, history of smoking, current  
123 smoker (within the past six months), alcohol use, heavy alcohol use, and any white matter  
124 disease [WMD, new and/or old]. All data regarding race and ethnicity categorization were  
125 abstracted directly from the electronic medical record (EMR); as such we are unable to  
126 definitively determine the source of the EMR reporting of race and ethnicity, whether it was self-  
127 identification or assigned by the admitting medical professional.

### 128 *Statistical Analyses*

129 Study variables were summarized using descriptive statistics (mean and standard deviation or  
130 median and interquartile range [IQR] and/or range for continuous variables and frequencies and  
131 percentages for categorical variables) by study groups (Dysphagia status: Yes vs. Tested and  
132 No; Dysphagia subgroups: Dysphagia Not Requiring PEG/NG vs. Dysphagia Requiring NG vs.  
133 Dysphagia Requiring PEG; assessment: assessed vs. not assessed). Distribution was examined  
134 for all continuous variables. Associations between categorical variables and study groups were  
135 tested using either Chi-square or Fisher's exact tests. Associations between continuous variables  
136 and study groups were tested using either two-sample t-tests, analysis of variance (ANOVA),

## Population study of post-stroke dysphagia

137 Wilcoxon rank sum tests, or Kruskal-Wallis tests. Comparisons between the three Dysphagia  
138 subgroups were adjusted for multiple comparisons using Bonferroni correction for categorical  
139 variables, NIHSS and Glasgow Coma Score and by applying Dunnett's test, following ANOVA,  
140 for age and deprivation index. Multivariable logistic regression analysis was carried out for  
141 Dysphagia status (Yes vs. Assessed and No) and dichotomized Dysphagia subgroups  
142 (Dysphagia requiring PEG or NG versus Dysphagia not requiring PEG or NG). P-values less or  
143 equal to 0.05 were declared as statistically significant. All analysis was carried out in SAS® 9.4  
144 (SAS Institute, Cary NC).

### 145 **Results**

146 A total of 5592 (2010 N=2644; 2015 N=2948) physician adjudicated and confirmed  
147 hospitalized strokes from 15 area hospitals in the Greater Cincinnati and Northern Kentucky  
148 region were reviewed.

#### 149 *Dysphagia Status and Dysphagia Sub-Group*

150 Dysphagia status could only be ascertained from 4139 cases, which made up the final sample  
151 for the analyses (**Figure 1**). Out of 4139, 1709 cases were determined to have dysphagia. Of  
152 these cases, 944 did not require alternative access to nutrition (i.e. PEG/NG), 437 required NG,  
153 and 328 required PEG placement (**Table 1**). In comparing the subgroups by year, there were no  
154 differences between 2015 and 2010 in terms of proportion of individuals per Dysphagia  
155 Subgroup.

#### 156 *Patient Characteristics – Demographics and Clinical Presentation*

157 Patients with dysphagia were significantly older (mean 72 years vs 67.2 years  
158  $p<0.0001$ ), a larger proportion were females (57% vs 52.2%,  $p=0.002$ ), had higher median  
159 NIHSS scores (8 vs 2;  $p<0.0001$ ), lower median Glasgow Coma scores (14 vs 15,  $p<0.0001$ ),  
160 higher median pre-stroke mRS scores (2 vs 1,  $p<0.0001$ ), and scored slightly higher on the  
161 mean deprivation index ( $p=0.01$ ) (**Table 2**).

## Population study of post-stroke dysphagia

162           Stroke lesion characteristics between Dysphagia groups differed (**Table 3**): the  
163 Dysphagia group had a larger proportion of hemorrhagic strokes as compared to those with No  
164 Dysphagia (16.5% vs 11.8%,  $p<0.0001$ ); the Dysphagia group had a greater proportion of “any  
165 right hemisphere” stroke when compared to the No Dysphagia group (51.3% vs 45.8%,  
166  $p=0.002$ ); amongst ischemic stroke cases, the Dysphagia group had a smaller proportion of  
167 small vessel strokes (9.3% vs 20.7%,  $p<0.0001$ ), a greater proportion of cardioembolic strokes  
168 (38.5% vs 21.9,  $p<0.0001$ ), and a smaller proportion of strokes where subtype could not be  
169 determined (32% vs 38.2%,  $p=0.0008$ ).

### 170 *Patient Characteristics - Pre-Morbid Conditions*

171           A larger proportion of individuals in the Dysphagia group as compared to the No  
172 Dysphagia group had a history of hypertension (84.5% vs 81%,  $p=0.004$ ), a history of coronary  
173 artery disease (36.2% vs 32%,  $p=0.0005$ ), history of congestive heart failure (23.5% vs 15.6%,  
174  $p<0.0001$ ), history of prior stroke (28.4% vs 25.6%,  $p=0.04$ ), and a history of dementia (16.7%  
175 vs 8.4%,  $p<0.0001$ ) (**Table 4**). There were a larger proportion of individuals in the No Dysphagia  
176 group who had a history of TIA (16.6% vs 13%,  $p=0.002$ ), who were current smokers (28.2% vs  
177 23.8%,  $p=0.002$ ) who reported alcohol use (at least 1-2 drinks per day; 41.7% vs 34.7%,  
178  $p<0.0001$ ), and those who had white matter disease (71.6% vs 68.5%,  $p=0.03$ ).

### 179 *Logistic Regression Model for Factors related to Dysphagia Status*

180           The variables that were considered for the logistic regression can be found in **Figure 2**.  
181 Variables that were included in the final model included age (per year increase), race (Black vs  
182 non-Black), baseline mRS score (0-1, i.e. functional vs 2-5), NIHSS (per point increase),  
183 Hemorrhage vs Infarct, lesion on the right side, high cholesterol, coronary artery disease,  
184 presence of white matter disease, deprivation index, and year of stroke (2015 vs 2010). The  
185 logistic regression model (ROC= 0.78; **Figure 2**) for dysphagia status revealed an increased  
186 risk of developing dysphagia after stroke for older individuals (Age/1 year OR=1.022,  $p<0.0001$ ),  
187 people of Black race (OR=1.225,  $p=0.04$ ), cases with higher NIHSS score (per point increase

## Population study of post-stroke dysphagia

188 OR=1.133,  $p<0.001$ ), cases with a hemorrhagic stroke vs an ischemic infarct (OR=1.472,  
189  $p=0.0004$ ), and having the stroke occur in the right hemisphere (OR=1.269,  $p=0.0011$ ). Factors  
190 showing decreased risk of dysphagia included having lower baseline mRS scores of 0-1  
191 (OR=0.657,  $p<0.0001$ ), having high cholesterol (OR=0.84,  $p=0.02$ ), having white matter disease  
192 (new or old, OR=0.801,  $p=0.01$ ), and having been a case in 2015 (OR=0.82,  $p=0.007$ ).

## 193 Discussion

194 In this large, population-based study we sought to characterize differences in patient  
195 factors underlying dysphagia status for individuals after stroke and to determine which of these  
196 factors were associated with an increased risk in developing dysphagia post stroke.

197 Less than half of our final sample with positive dysphagia status required alternative  
198 access to nutrition via PEG or NG tube (**Table 1**). We found a greater proportion of individuals  
199 with dysphagia compared to those with no dysphagia were older, female, and had higher  
200 impairment scores upon stroke admission (i.e. NIHSS, GCS) and pre-stroke mRS (**Table 2**). It  
201 has been well established that increased age results in age-related changes to swallow  
202 movements and timing<sup>25-29</sup> that may predispose older individuals to developing swallowing  
203 impairments after stroke. Regarding our finding associating female sex with swallowing  
204 impairments after stroke, a recent study showed that women had more severe outcomes after  
205 ischemic stroke as compared to men, which could result in worse swallowing outcomes after  
206 stroke.<sup>30</sup> However, another study of 578 patients in Seoul, South Korea found no relationship  
207 between swallowing outcomes after stroke and patient sex.<sup>31</sup> These alternative findings could  
208 be due to regional and cultural differences. Published evidence about influence of racial and  
209 ethnic background on stroke severity and outcome measures is mixed.<sup>32</sup> However, some  
210 literature suggests an ethnicity-age interaction, which could not be examined in these data, due  
211 to a small number of Hispanic individuals in our study population, could be influential. Other  
212 evidence points to some impact of socio-economic disparities amongst specific ethnic groups  
213 could be a contributing factor,<sup>33</sup> which is also supported by our data. Our data also showed that



## Population study of post-stroke dysphagia

214 Deprivation Index scores were slightly higher in the Dysphagia group as compared to the No  
215 Dysphagia group, however, these were not found to be influential in the logistic regression  
216 (**Figure 2**). These discrepancies in the literature regarding the influence of sex and ethnicity in  
217 stroke-related outcomes, in general and specific to swallowing, highlight that more work is  
218 needed to investigate biological drivers for these differences.

219 Lesion type differed between the Dysphagia and No Dysphagia Groups, with a greater  
220 proportion of hemorrhagic, and right hemisphere strokes in the Dysphagia Group, which is  
221 supported by the literature.<sup>13,34,35</sup> Similarly, our findings of more dysphagia occurring with  
222 increasing stroke severity (NIHSS, Glasgow Coma score,), initial pre-stroke status as measured  
223 by mRS, hemorrhagic stroke, and right hemisphere lesions are also consistent with prior  
224 literature.<sup>13,35-40</sup> There have been some other studies, with smaller samples,<sup>41-43</sup> questioning  
225 the influence of laterality in development of dysphagia, but our findings provide more evidence  
226 towards hemispheric location of lesion being a potential risk factor for developing swallowing  
227 impairments. Our findings for stroke subtype also demonstrated that there were a greater  
228 proportion of cardioembolic strokes in the Dysphagia Group with ischemic stroke. This could be  
229 related to the increased likelihood of cardioembolic infarcts resulting in hemorrhagic  
230 transformation,<sup>44</sup> and as noted, hemorrhagic strokes may be more likely to present with  
231 dysphagia.

232 Regarding pre-morbid factors and development of dysphagia, we found that a greater  
233 proportion of individuals with a history of coronary artery disease, congestive heart failure, prior  
234 stroke, dementia, and hypertension in the Dysphagia Group as compared to the No Dysphagia  
235 Group.<sup>45,46</sup> Alcohol use, current cigarette smoking status, high cholesterol and prior TIA were  
236 also significantly different between the groups, with a higher proportion of individuals in the No  
237 Dysphagia group. While prior studies don't directly study effects of alcohol consumption on  
238 development of dysphagia, alcohol use is known as risk factor for stroke.<sup>47,48</sup> However, studies  
239 have also shown that moderate alcohol use may reduce risk of ischemic stroke,<sup>49</sup> and that

## Population study of post-stroke dysphagia

240 alcohol use does not affect stroke severity or outcomes after stroke.<sup>50</sup> These mixed results  
241 suggest that there may be a more complex relationship between alcohol consumption and  
242 stroke-related recovery, including swallowing, that has yet to be fully discovered.

243         Prior literature clearly demonstrate that individuals with cardiac conditions and  
244 dysphagia have a more difficult recovery and often poorer outcomes.<sup>51,52</sup> However, it is difficult  
245 to determine whether these cardiac conditions made patients more susceptible to developing  
246 dysphagia after stroke simply because these individuals are more medically compromised, or if  
247 there is a causal relationship between these conditions and swallowing impairments. In fact, our  
248 logistic regression results did not indicate increased risk of dysphagia development for patients  
249 with a history of coronary artery disease after accounting for other potential risk factors (**Table**  
250 **4**), which may indicate the former hypothesis being more explanatory of these findings.

251         Other factors that were predictive of developing dysphagia after stroke included  
252 increased age, Black race, higher NIHSS score at presentation, having a hemorrhagic stroke  
253 (vs infarct), and right hemispheric stroke. Factors associated with decreased risk included  
254 patients having a history of high cholesterol, lower pre-stroke mRS, and any white matter  
255 disease detected on clinical imaging. Several findings were either surprising, or are still unclear  
256 in their meaning. As discussed, literature on ethnic and racial disparities in stroke severity and  
257 post-stroke care shows very mixed evidence and appears to be influenced by regional location  
258 and/or size of study. Prior published data have indicated that Black individuals have more  
259 severe strokes acutely than White individuals.<sup>53</sup> Current evidence provided in our study  
260 provides further emphasis of need for better understanding contributions of biological vs  
261 socioeconomic disparity to stroke-related outcomes in Black patients vs other racial categories.

262 <sup>54</sup>

263         The findings regarding hyperlipidemia and any evidence of white matter disease on  
264 clinical stroke imaging being protective for risk of developing dysphagia after stroke were also  
265 unexpected. One hypothesis regarding the relationship between hyperlipidemia and lesser risk

## Population study of post-stroke dysphagia

266 of dysphagia could be due to use of statin medications in this population. Literature supports the  
267 possibility that use of statins pre-stroke may reduce severity of stroke.<sup>55</sup> One study specifically  
268 looking at effects of statin therapy and development of post-stroke pneumonia suggested that  
269 patients who were using statins prior to admission for stroke and were treated with thrombolysis  
270 during admission were less likely to develop a pneumonia.<sup>56</sup> This finding should be explored  
271 more specifically in future studies of post-stroke dysphagia development, as this could be a  
272 potential protective treatment for individuals at risk of both stroke and dysphagia. In terms of any  
273 evidence of white matter disease serving as protective, this could be an incidental finding driven  
274 by interdependency among the many factors explored in this study. Given that we were unable  
275 to measure new white matter disease in these patients at the time of clinical imaging (i.e.  
276 differentiate new WMD from existing WMD before acute admission), it is difficult to tease out the  
277 meaning of this particular finding. Design of future studies of white matter disease and  
278 dysphagia could potentially include a cohort of repeat stroke patients with available prior clinical  
279 imaging in an attempt to better understand the relationship between existing and new WMD in  
280 post-stroke dysphagia.

### 281 **Limitations**

282 The primary limitations of this study are due to the nature of retrospective analysis of data  
283 collected as part of a large data set; therefore, several broad and more nuanced factors were  
284 not available for use in our data analysis for both epidemiological factors and patient medical  
285 history. Most notably, this included the type of medical professional completing dysphagia  
286 evaluation and/or screening (e.g. speech-language pathologist or nursing professional). Further,  
287 the source of patient demographic factors (i.e. self-report vs determination by medical  
288 professional) related to race and ethnicity are not able to be determined in this type of  
289 retrospective dataset. These factors may have impacted classification of patients within certain  
290 groupings in our analysis. Further, the inability to differentiate new vs old WMD limits our ability  
291 to fully interpret the role of WMD in development of dysphagia after stroke.

## Population study of post-stroke dysphagia

### 292 **Conclusions**

293 This large, population-based study confirms several factors that have been frequently  
294 demonstrated in the literature to be associated with developing dysphagia after stroke, including  
295 older age, dementia status, more severe stroke, and lesion type and location. However, other  
296 factors emerged that are not clear in their biological meaning or association, particularly findings  
297 related to certain racial/ethnic groups being significant factors for dysphagia development after  
298 stroke. These and other factors indicating a reduced risk, hyperlipidemia and any presence of  
299 white matter disease, should be considered in future prospective work to better understand  
300 these relationships and how these conditions may affect acute stroke recovery in the setting of  
301 dysphagia.

302

## Population study of post-stroke dysphagia

- 303 **Sources of Funding:** National Institute of Neurologic Disorders and Stroke,  
304 R01NS030678.
- 305 **Disclosures:**
- 306 BN Krekeler: Reports research support from the National Institutes of Health  
307 NIH/NCMRR/NICHHD
- 308 HJP Schieve: No relevant disclosures
- 309 J Khoury: Reports research support from the National Institutes of Health NIH/NINDS
- 310 L Ding: No relevant disclosures
- 311 M Haverbusch: Reports research support from the National Institutes of Health NIH/NINDS
- 312 K Alwell: No relevant disclosures
- 313 O Adeoye: Reports research support from the National Institutes of Health NIH/NINDS and  
314 Equity Holder and Co-Founder – Sense Diagnostics, Inc.
- 315 S Ferioli: No relevant disclosures
- 316 J Mackey: Reports research support from the National Institutes of Health NIH/NINDS
- 317 D Woo: Reports research support from the National Institutes of Health NIH/NINDS
- 318 M Flaherty: Speaker’s bureau- CSL Behring and Alexion, Co-founder, employee, and equity  
319 holder: Sense Diagnostics, Inc., Clinical trial endpoint adjudication committee member:  
320 Boehringer Ingelheim and LG Chem
- 321 F De Los Rios La Rosa:
- 322 S Demel: No relevant disclosures
- 323 M Star: No relevant disclosures
- 324 E Coleman: No relevant disclosures
- 325 K Walsh: AstraZeneca: Speaker’s Bureau American Heart Association, NIH, Sense Diagnostics  
326 LLC, Jan Medical Inc: Grant Funding/Research Support
- 327 S Slavin: No relevant disclosures
- 328 A Jasne: No relevant disclosures

## Population study of post-stroke dysphagia

329 E Mistry: Reports research support from the National Institutes of Health NIH/NINDS

330 D Kleindorfer: No relevant disclosures

331 B Kissela: Reports research support from the National Institutes of Health NIH/NINDS

332

333

334

335

## Population study of post-stroke dysphagia

336 **Table 1.** Dysphagia Subgroup Status by Year

337

| <b>Dysphagia Subgroup</b><br>n = 1709 | Dysphagia Not Requiring PEG/NG<br>n =944 | Dysphagia Requiring NG<br>n = 437 | Dysphagia Requiring PEG<br>n = 328 |
|---------------------------------------|------------------------------------------|-----------------------------------|------------------------------------|
| <b>Year</b>                           |                                          |                                   |                                    |
| <b>2010</b> (n=782)                   | 406 (51.9%)                              | 223 (28.5%)                       | 153 (19.6%)                        |
| <b>2015</b> (n=927)                   | 538 (58.0%)                              | 214 (23.1%)                       | 175 (18.9%)                        |
| p-value<br>(2010 vs 2015)             | 0.03                                     | 0.03                              | 1.0                                |

\*All p-values are Bonferroni adjusted

338

339

Population study of post-stroke dysphagia

340 **Table 2.** Demographics and Clinical Presentation by Dysphagia Status

|                                                       | Dysphagia    | No Dysphagia | p-value |
|-------------------------------------------------------|--------------|--------------|---------|
| <b>N</b>                                              | 1709         | 2430         |         |
| <b>Age, year, mean (std)</b>                          | 72.0 (14.7)  | 67.2 (14.8)  | <.0001  |
| <b>Race</b>                                           |              |              | 0.06    |
| White + other                                         | 1278 (74.8%) | 1877 (77.3%) |         |
| Black                                                 | 431 (25.2%)  | 551 (22.7%)  |         |
| Unknown*                                              | 1 (0.06%)    | 1 (0.04%)    |         |
| <b>Ethnicity</b>                                      |              |              | 0.02    |
| Hispanic                                              | 6 (0.4%)     | 14 (0.6%)    |         |
| Non-Hispanic                                          | 1211 (70.9%) | 1804 (74.3%) |         |
| Unknown                                               | 492 (28.8%)  | 611 (25.2%)  |         |
| <b>Sex (M vs F)</b>                                   |              |              | 0.002   |
| Males                                                 | 735 (43.0%)  | 1161 (47.8%) |         |
| Females                                               | 974 (57.0%)  | 1268 (52.2%) |         |
| <b>Baseline NIHSS</b>                                 |              |              | <.0001  |
| <b>Median (25<sup>th</sup>, 75<sup>th</sup> %ile)</b> | 8 (3, 16)    | 2 (1, 5)     |         |
| <b>[min, max]</b>                                     | [0, 40]      | [0, 39]      |         |
| <b>Glasgow Coma Score</b>                             |              |              | <.0001  |
| <b>Median (25<sup>th</sup>, 75<sup>th</sup> %ile)</b> | 14 (11, 15)  | 15 (15,15)   |         |
| <b>[min, max]</b>                                     | [3, 15]      | [3, 15]      |         |
| <b>Baseline mRS</b>                                   |              |              | <.0001  |
| <b>Median (25<sup>th</sup>, 75<sup>th</sup> %ile)</b> | 2 (0, 3)     | 1 (0, 3)     |         |
| <b>[min, max]</b>                                     | [0, 5]       | [0, 5]       |         |
| <b>Baseline mRS 0-1</b>                               | 610 (35.8%)  | 1280 (52.7%) | <.0001  |
| <b>Deprivation Index, mean (std)</b>                  | 0.38 (0.13)  | 0.37 (0.13)  | 0.01    |

\*Unknown not included in statistical comparison

341

342

343



Population study of post-stroke dysphagia

344 **Table 3.** Lesion Characteristics by Dysphagia Status

|                                    | Dysphagia    | No Dysphagia | p-value <sup>345</sup> |
|------------------------------------|--------------|--------------|------------------------|
| <b>N</b>                           | 1709         | 2430         |                        |
| <b>Type of Case</b>                |              |              | <.0001*                |
| Infarct                            | 1426 (83.4%) | 2142 (88.1%) |                        |
| Hemorrhagic (ICH/SAH)              | 281 (16.5%)  | 287 (11.8%)  |                        |
| Unknown†                           | 2 (0.1%)     | 1 (0.03%)    |                        |
| <b>Lesion Location(s)</b>          |              |              | <.0001*                |
| Left Hemisphere only               | 681 (39.8%)  | 1017 (41.8%) |                        |
| Any Left Hemisphere                | 946 (55.4%)  | 1292 (53.2%) | 0.64**                 |
| Right Hemisphere only              | 610 (35.7%)  | 854 (35.1%)  |                        |
| Any Right Hemisphere               | 877 (51.3%)  | 1113 (45.8%) | 0.002**                |
| Brainstem only                     | 4 (0.2%)     | 7 (0.3%)     |                        |
| Any Brainstem                      | 153 (9.0%)   | 187 (7.7%)   | 0.57**                 |
| Mixed Hemispheric (L+R only)       | 171 (10.0%)  | 165 (6.8%)   |                        |
| Mixed (L and/or R + brainstem)     | 149 (8.7%)   | 180 (7.4%)   |                        |
| Unknown                            | 94 (5.5%)    | 207 (8.5%)   |                        |
| <b>Stroke subtype Infarct only</b> |              |              | <.0001*                |
| Small vessel (1)                   | 132 (9.3%)   | 444 (20.7%)  | <.0001**               |
| Cardioembolic (2)                  | 549 (38.5%)  | 470 (21.9%)  | <.0001**               |
| Large vessel (3)                   | 189 (13.3%)  | 294 (13.7%)  | 0.97**                 |
| Other identified (5)               | 99 (7.0%)    | 116 (5.4%)   | 0.24**                 |
| Undetermined (8)                   | 456 (32.0%)  | 818 (38.2%)  | 0.0008**               |

\*overall significance; \*\*after correcting for multiple testing; †unknown not included in the analysis

## Population study of post-stroke dysphagia

346 **Table 4.** Pre-Morbid Conditions by Dysphagia Status

|                                     | Dysphagia    | No Dysphagia | p-value |
|-------------------------------------|--------------|--------------|---------|
| <b>N</b>                            | 1709         | 2430         |         |
| History of Hypertension             | 1444 (84.5%) | 1969 (81.0%) | 0.004   |
| History of Diabetes                 | 611 (35.8%)  | 870 (35.8%)  | 0.97    |
| History of Elevated Cholesterol     | 944 (55.2%)  | 1405 (57.8%) | 0.10    |
| Coronary Heart Disease              | 794 (46.5%)  | 938 (38.6%)  | <.0001  |
| History of Coronary Artery Disease  | 618 (36.2%)  | 777 (32.0%)  | 0.005   |
| History of Myocardial Infarction    | 255 (14.9%)  | 341 (14.0%)  | 0.42    |
| History of Congestive Heart Failure | 401 (23.5%)  | 379 (15.6%)  | <.0001  |
| Prior Stroke                        | 486 (28.4%)  | 621 (25.6%)  | 0.04    |
| Prior TIA                           | 223 (13.0%)  | 404 (16.6%)  | 0.002   |
| History of Dementia                 | 286 (16.7%)  | 204 (8.4%)   | <.0001  |
| History of Brain Injury/Tumor       | 12 (0.7%)    | 15 (0.6%)    | 0.84    |
| History of Smoking (Cigarettes)     | 949 (55.5%)  | 1400 (57.6%) | 0.18    |
| Current Smoker (Cigarettes)         | 407 (23.8%)  | 686 (28.2%)  | 0.002   |
| Alcohol Use                         | 593 (34.7%)  | 1013 (41.7%) | <.0001  |
| Heavy Alcohol use                   | 159 (9.3%)   | 212 (8.7%)   | 0.52    |
| White Matter Disease (any)          | 1171 (68.5%) | 1739 (71.6%) | 0.03    |

347

348

349

## Population study of post-stroke dysphagia

350 **Figure 1.** Number of Strokes included from Greater Cincinnati Northern Kentucky Stroke Study  
351 in 2010 and 2015

352

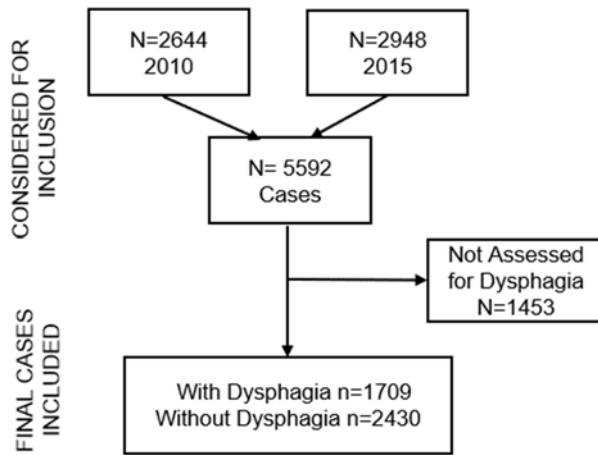

Population study of post-stroke dysphagia

353 **Figure 2.** Logistic Regression by Dysphagia Status

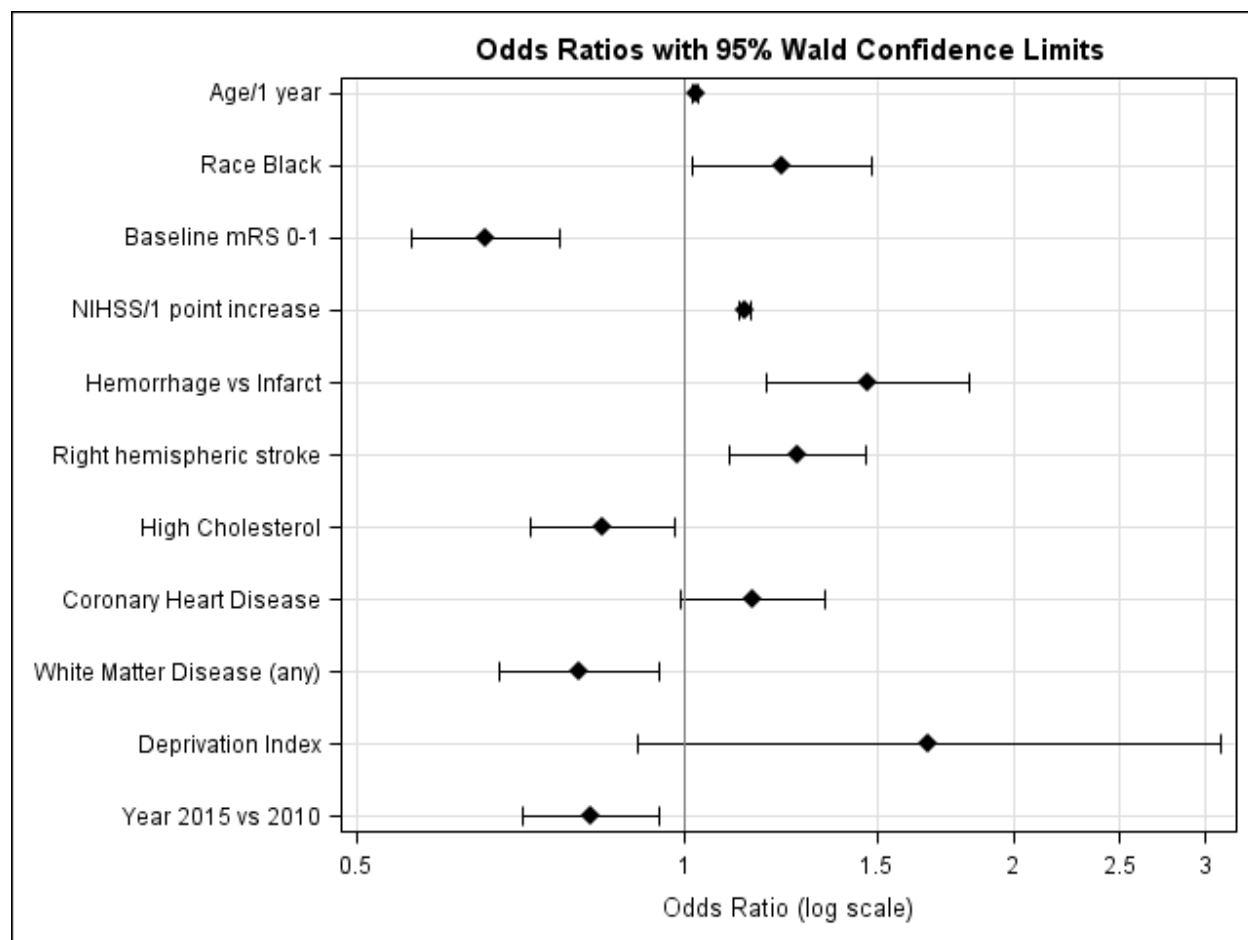

354

| Variable                          | Adjusted Odds Ratio (aOR) | Lower 95% CI | Upper 95% CI | p-value |
|-----------------------------------|---------------------------|--------------|--------------|---------|
| <b>Age / 1 year</b>               | 1.022                     | 1.016        | 1.028        | <.0001  |
| <b>Black Race</b>                 | 1.225                     | 1.013        | 1.481        | 0.04    |
| <b>Baseline mRS 0-1</b>           | 0.657                     | 0.562        | 0.769        | <.0001  |
| <b>NIHSS / 1 point increase</b>   | 1.133                     | 1.120        | 1.147        | <.0001  |
| <b>Hemorrhage vs Infarct</b>      | 1.472                     | 1.189        | 1.822        | 0.0004  |
| <b>Right hemispheric stroke</b>   | 1.269                     | 1.100        | 1.463        | 0.0011  |
| <b>High Cholesterol</b>           | 0.840                     | 0.721        | 0.978        | 0.02    |
| <b>Coronary Artery Disease</b>    | 1.153                     | 0.990        | 1.343        | 0.07    |
| <b>White Matter Disease (any)</b> | 0.801                     | 0.676        | 0.949        | 0.01    |
| <b>Deprivation Index</b>          | 1.673                     | 0.904        | 3.096        | 0.10    |
| <b>Year 2015</b>                  | 0.820                     | 0.710        | 0.947        | 0.007   |

355

## Population study of post-stroke dysphagia

### 356 References

- 357 1. Crary MA, Humphrey JL, Carnaby-Mann G, Sambandam R, Miller L, Silliman S.  
358 Dysphagia, nutrition, and hydration in ischemic stroke patients at admission and  
359 discharge from acute care. *Dysphagia*. 2013;28:69-76.
- 360 2. Ojo O, Brooke J. The use of enteral nutrition in the management of stroke. *Nutrients*.  
361 2016;8:827.
- 362 3. Martino R, Foley N, Bhogal S, Diamant N, Speechley M, Teasell R. Dysphagia after  
363 stroke: incidence, diagnosis, and pulmonary complications. *stroke*. 2005;36:2756-2763.
- 364 4. Perry L, Love CP. Screening for dysphagia and aspiration in acute stroke: a systematic  
365 review. *Dysphagia*. 2001;16:7-18.
- 366 5. Eslick GD, Talley N. Dysphagia: epidemiology, risk factors and impact on quality of life—a  
367 population-based study. *Alimentary pharmacology & therapeutics*. 2008;27:971-979.
- 368 6. Humbert IA, Robbins J. Dysphagia in the elderly. *Physical medicine and rehabilitation  
369 clinics of North America*. 2008;19:853-866.
- 370 7. Altman KW, Yu G-P, Schaefer SD. Consequence of dysphagia in the hospitalized  
371 patient: impact on prognosis and hospital resources. *Archives of Otolaryngology–Head &  
372 Neck Surgery*. 2010;136:784-789.
- 373 8. Cabre M, Serra-Prat M, Palomera E, Almirall J, Pallares R, Clavé P. Prevalence and  
374 prognostic implications of dysphagia in elderly patients with pneumonia. *Age and ageing*.  
375 2010;39:39-45.
- 376 9. Cichero JA, Altman KW. Definition, prevalence and burden of oropharyngeal dysphagia:  
377 a serious problem among older adults worldwide and the impact on prognosis and  
378 hospital resources. In: *Stepping stones to living well with dysphagia*. Karger Publishers;  
379 2012:1-11.
- 380 10. Cohen DL, Roffe C, Beavan J, Blackett B, Fairfield CA, Hamdy S, Havard D, McFarlane  
381 M, McLaughlin C, Randall M. Post-stroke dysphagia: A review and design considerations  
382 for future trials. *International Journal of Stroke*. 2016;11:399-411.
- 383 11. Wilmskoetter J, Bonilha L, Martin-Harris B, Elm JJ, Horn J, Bonilha HS. Mapping acute  
384 lesion locations to physiological swallow impairments after stroke. *NeuroImage: Clinical*.  
385 2019;22:101685.
- 386 12. Wilmskoetter J, Martin-Harris B, Pearson Jr WG, Bonilha L, Elm JJ, Horn J, Bonilha HS.  
387 Differences in swallow physiology in patients with left and right hemispheric strokes.  
388 *Physiology & behavior*. 2018;194:144-152.
- 389 13. Daniels SK, Pathak S, Mukhi SV, Stach CB, Morgan RO, Anderson JA. The relationship  
390 between lesion localization and dysphagia in acute stroke. *Dysphagia*. 2017;32:777-784  
391 @ 1432-0460.
- 392 14. Mann G, Hankey GJ, Cameron D. Swallowing function after stroke: prognosis and  
393 prognostic factors at 6 months. *Stroke*. 1999;30:744-748.
- 394 15. Kunitz SJ. Sex, race and social role—history and the social determinants of health.  
395 *International Journal of Epidemiology*. 2006;36:3-10. doi: 10.1093/ije/dyl296
- 396 16. U.S. Department of Health and Human Services. Social Determinants of Health; Healthy  
397 People 2030. Retrieved from [https://health.gov/healthypeople/objectives-and-](https://health.gov/healthypeople/objectives-and-data/social-determinants-health)  
398 [data/social-determinants-health](https://health.gov/healthypeople/objectives-and-data/social-determinants-health)
- 399 17. Broderick J, Brott T, Kothari R, Miller R, Khoury J, Pancioli A, Gebel J, Mills D, Minneci  
400 L, Shukla R. The Greater Cincinnati/Northern Kentucky Stroke Study: preliminary first-  
401 ever and total incidence rates of stroke among blacks. *Stroke*. 1998;29:415-421.
- 402 18. Zakaria T, Lindsell CJ, Kleindorfer D, Alwell K, Moomaw CJ, Woo D, Szaflarski JP,  
403 Khoury J, Miller R, Broderick JP. Age accounts for racial differences in ischemic stroke

## Population study of post-stroke dysphagia

- 404 volume in a population-based study. *Cerebrovascular Diseases*. 2008;26:376-380 %@  
405 1015-9770.
- 406 19. Kissela B, Broderick J, Woo D, Kothari R, Miller R, Khoury J, Brott T, Pancioli A, Jauch  
407 E, Gebel J. Greater Cincinnati/Northern Kentucky Stroke Study: volume of first-ever  
408 ischemic stroke among blacks in a population-based study. *Stroke*. 2001;32:1285-1290.
- 409 20. Madsen TE, Khoury JC, Leppert M, Alwell K, Moomaw CJ, Sucharew H, Woo D, Ferioli  
410 S, Martini S, Adeoye O. Temporal trends in stroke incidence over time by sex and age in  
411 the GCNKSS. *Stroke*. 2020;51:1070-1076 %@ 0039-2499.
- 412 21. Madsen TE, Cummings OW, De Los Rios La Rosa F, Khoury JC, Alwell K, Woo D,  
413 Ferioli S, Martini S, Adeoye O, Khatri P. Substance Use and Performance of Toxicology  
414 Screens in the Greater Cincinnati Northern Kentucky Stroke Study. *Stroke*.  
415 2022;53:3082-3090.
- 416 22. Chen BJ, Suolang D, Frost N, Faigle R. Practice Patterns and Attitudes Among Speech-  
417 Language Pathologists Treating Stroke Patients with Dysphagia: A Nationwide Survey.  
418 *Dysphagia*. 2022;37:1715-1722.
- 419 23. Fairfield CA, G. Smithard D. Assessment and management of dysphagia in acute stroke:  
420 An initial service review of international practice. *Geriatrics*. 2020;5:4.
- 421 24. Brokamp C, Beck AF, Goyal NK, Ryan P, Greenberg JM, Hall ES. Material community  
422 deprivation and hospital utilization during the first year of life: an urban population-based  
423 cohort study. *Annals of epidemiology*. 2019;30:37-43.
- 424 25. Robbins J, Humpal NS, Banaszynski K, Hind J, Rogus-Pulia N. Age-related differences  
425 in pressures generated during isometric presses and swallows by healthy adults.  
426 *Dysphagia*. 2016;31:90-96.
- 427 26. Azzolino D, Damanti S, Bertagnoli L, Lucchi T, Cesari M. Sarcopenia and swallowing  
428 disorders in older people. *Aging Clinical & Experimental Research*. 2019;31:799-805.  
429 doi: 10.1007/s40520-019-01128-3
- 430 27. Wakabayashi H. Presbyphagia and Sarcopenic Dysphagia: Association between Aging,  
431 Sarcopenia, and Deglutition Disorders. *J Frailty Aging*. 2014;3:97-103. doi:  
432 10.14283/jfa.2014.8
- 433 28. Robbins J, Levine R, Wood J, Roecker EB, Luschei E. Age effects on lingual pressure  
434 generation as a risk factor for dysphagia. *J Gerontol A Biol Sci Med Sci*. 1995;50:M257-  
435 262.
- 436 29. Robbins JA. Normal swallowing and aging. Paper/Poster presented at: Seminars in  
437 neurology; 1996;
- 438 30. Phan HT, Reeves MJ, Blizzard CL, Thrift AG, Cadilhac DA, Sturm J, Otahal P, Rothwell  
439 P, Bejot Y, Cabral NL. Sex differences in severity of stroke in the INSTRUCT study: a  
440 meta-analysis of individual participant data. *Journal of the American Heart Association*.  
441 2019;8:e010235.
- 442 31. Kim J, Oh B-M, Lee GJ, Lee SA, Chun SW, Han TR. Clinical factors associated with  
443 severity of post-stroke dysphagia. *Brain & Neurorehabilitation*. 2011;4:116-120.
- 444 32. Ellis C, Hyacinth HI, Beckett J, Feng W, Chimowitz M, Ovbiagele B, Lackland D, Adams  
445 R. Racial/Ethnic Differences in Poststroke Rehabilitation Outcomes. *Stroke Research  
446 and Treatment*. 2014;2014:950746. doi: 10.1155/2014/950746
- 447 33. Stansbury JP, Jia H, Williams LS, Vogel WB, Duncan PW. Ethnic disparities in stroke:  
448 epidemiology, acute care, and postacute outcomes. *Stroke*. 2005;36:374-386.
- 449 34. Paciaroni M, Mazzotta G, Corea F, Caso V, Venti M, Milia P, Silvestrelli G, Palmerini F,  
450 Parnetti L, Gallai V. Dysphagia following stroke. *European neurology*. 2004;51:162-167.
- 451 35. Suntrup S, Kemmling A, Warnecke T, Hamacher C, Oelenberg S, Niederstadt T, Heindel  
452 W, Wiendl H, Dziewas R. The impact of lesion location on dysphagia incidence, pattern  
453 and complications in acute stroke. Part 1: dysphagia incidence, severity and aspiration.  
454 *European journal of neurology*. 2015;22:832-838.

## Population study of post-stroke dysphagia

- 455 36. Henke C, Foerch C, Lapa S. Early screening parameters for dysphagia in acute  
456 ischemic stroke. *Cerebrovascular Diseases*. 2017;44:285-290.
- 457 37. Jeyaseelan RD, Vargo MM, Chae J. National Institutes of Health Stroke Scale (NIHSS)  
458 as an early predictor of poststroke dysphagia. *PM&R*. 2015;7:593-598.
- 459 38. Crary MA, Carnaby-Mann GD, Miller L, Antonios N, Silliman S. Dysphagia and nutritional  
460 status at the time of hospital admission for ischemic stroke. *Journal of Stroke and*  
461 *cerebrovascular diseases*. 2006;15:164-171.
- 462 39. Khedr EM, Abbass MA, Soliman RK, Zaki AF, Gamea A. Post-stroke dysphagia:  
463 frequency, risk factors, and topographic representation: hospital-based study. *The*  
464 *Egyptian Journal of Neurology, Psychiatry and Neurosurgery*. 2021;57:1-8.
- 465 40. Robbins J, Levine RL, Maser A, Rosenbek JC, Kempster GB. Swallowing after unilateral  
466 stroke of the cerebral cortex. *Archives of physical medicine and rehabilitation*.  
467 1993;74:1295-1300.
- 468 41. Fernández-Pombo A, Seijo-Raposo IM, López-Osorio N, Cantón-Blanco A, González-  
469 Rodríguez M, Arias-Rivas S, Rodríguez-Yáñez M, Santamaría-Nieto A, Díaz-Ortega C,  
470 Gómez-Vázquez E. Lesion location and other predictive factors of dysphagia and its  
471 complications in acute stroke. *Clinical nutrition ESPEN*. 2019;33:178-182.
- 472 42. Suntrup-Krueger S, Kemmling A, Warnecke T, Hamacher C, Oelenberg S, Niederstadt  
473 T, Heindel W, Wiendl H, Dziewas R. The impact of lesion location on dysphagia  
474 incidence, pattern and complications in acute stroke. Part 2: Oropharyngeal residue,  
475 swallow and cough response, and pneumonia. *European journal of neurology*.  
476 2017;24:867-874.
- 477 43. Sharma J, Fletcher S, Vassallo M, Ross I. Prognostic value of CT scan features in acute  
478 ischaemic stroke and relationship with clinical stroke syndromes. *International journal of*  
479 *clinical practice*. 2000;54:514-518.
- 480 44. Hornig CR, Bauer T, Simon C, Trittmacher S, Dorndorf W. Hemorrhagic transformation  
481 in cardioembolic cerebral infarction. *Stroke*. 1993;24:465-468.
- 482 45. Easterling CS, Robbins E. Dementia and dysphagia. *Geriatric Nursing*. 2008;29:275-  
483 285.
- 484 46. Smithard DG, O'Neill PA, England RE, Park CL, Wyatt R, Martin DF, Morris J. The  
485 natural history of dysphagia following a stroke. *Dysphagia*. 1997;12:188-193.
- 486 47. Shiotsuki H, Saijo Y, Ogushi Y, Kobayashi S. Relationship between Alcohol Intake and  
487 Stroke Severity in Japanese Patients: a Sex-and Subtype-Stratified Analysis. *Journal of*  
488 *Stroke and Cerebrovascular Diseases*. 2022;31:106513.
- 489 48. O'donnell MJ, Xavier D, Liu L, Zhang H, Chin SL, Rao-Melacini P, Rangarajan S, Islam  
490 S, Pais P, McQueen MJ. Risk factors for ischaemic and intracerebral haemorrhagic  
491 stroke in 22 countries (the INTERSTROKE study): a case-control study. *The Lancet*.  
492 2010;376:112-123.
- 493 49. Elkind MS, Sciacca R, Boden-Albala B, Rundek T, Paik MC, Sacco RL. Moderate  
494 alcohol consumption reduces risk of ischemic stroke: the Northern Manhattan Study.  
495 *Stroke*. 2006;37:13-19.
- 496 50. Fekete K, Szatmári S, Szócs I, Szekeres C, Szász J, Mihálka L, Smolanka V, Kardos L,  
497 Csiba L, Bereczki D. Prestroke alcohol consumption and smoking are not associated  
498 with stroke severity, disability at discharge, and case fatality. *Journal of Stroke and*  
499 *Cerebrovascular Diseases*. 2014;23:e31-e37.
- 500 51. Matsuo H, Yoshimura Y, Fujita S, Maeno Y. Dysphagia is associated with poor physical  
501 function in patients with acute heart failure: a prospective cohort study. *Aging Clinical*  
502 *and Experimental Research*. 2020;32:1093-1099.
- 503 52. Matsuo H, Yoshimura Y, Fujita S, Maeno Y. Incidence of Dysphagia and Its Association  
504 With Functional Recovery and 1-Year Mortality in Hospitalized Older Patients With Heart

## Population study of post-stroke dysphagia

- 505 Failure: A Prospective Cohort Study. *Journal of Parenteral and Enteral Nutrition*.  
506 2021;45:372-380.
- 507 53. Jones MR, Horner RD, Edwards LJ, Hoff J, Armstrong SB, Smith-Hammond CA,  
508 Matchar DB, Oddone EZ. Racial variation in initial stroke severity. *Stroke*. 2000;31:563-  
509 567.
- 510 54. Howard VJ. Reasons underlying racial differences in stroke incidence and mortality.  
511 *Stroke*. 2013;44:S126-S128.
- 512 55. Hong K-S, Lee JS. Statins in acute ischemic stroke: a systematic review. *Journal of*  
513 *stroke*. 2015;17:282.
- 514 56. Scheitz JF, Endres M, Heuschmann PU, Audebert HJ, Nolte CH. Reduced risk of  
515 poststroke pneumonia in thrombolized stroke patients with continued statin treatment.  
516 *International Journal of Stroke*. 2015;10:61-66.
- 517
